# Supplementary material
Source: ML conference proceedings conference paper supplement (https://openaccess.thecvf.com/content/WACV2023/html/Wu_Few-Shot_Learning_of_WACV_2023_paper.html)
Supplement: Supplementary file 1 [file Wu_Few-Shot_Learning_of_WACV_2023_supplemental.pdf]

# Supplementary Material

## 1. Ablation Studies

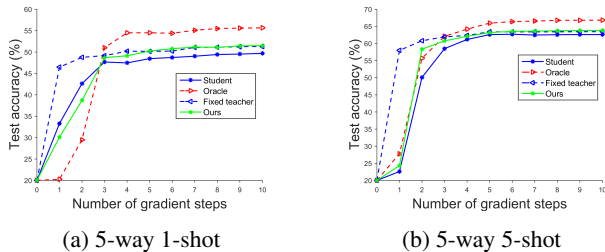

Figure 1: **Effect of the number of gradient updates during testing.** We show results of 5-way 1-shot model (a) and 5-way 5-shot model (b) trained on miniImageNet.

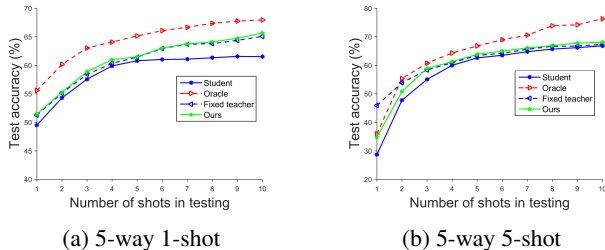

Figure 2: **Effect of the number of images in the support set during testing.** We show results of 5-way 1-shot model (a) and 5-way 5-shot model (b) trained on miniImageNet.

**Effect of the number of gradient updates.** In this experiment, we study the effect of the number of gradient updates during meta-testing. The results are shown in Fig. 1. Here we show the results of both 1-shot and 5-shot models trained on mini-ImageNet. During meta-training, the number of inner update is set to 5. In Fig. 1, we show how the test accuracy varies when we take different numbers of gradient updates during testing. We can see that the accuracy saturates around five gradient updates.

**Effect of the support set size.** Here we study how the test accuracy varies when we change the number of shots during testing. The results are shown in Fig. 2. Again we show the results of both 1-shot and 5-shot models trained on mini-ImageNet. We can see that even though the models are trained with 1-shot or 5-shot, the test accuracy generally increases when more shots are available during testing.
